# Supplementary material
Source: publisher figshare collection journal article supplement (https://rs.figshare.com/ndownloader/files/28860750)
Supplement: Supplementary file 1 [file 28860750]

## Sheet: metadata
Datafile S10. Summary data for 31 clades
The first 15 clades correspond to the kingdom-level clades used in the main analyses.
The other 16 clades are phyla of archaeans and bacteria, with data from Scholl and Wiens (2016)
Data include the estimated percentage of species that are multicellular in each clade, and the estimated percentage having sexual reproduction.
Data on whether clades are eukaryotes (1) or not (0) are also included.
Ages are in millions of years before present.
Richness is the estimated number of described speciss
Diversification rates were estimated using an epsilon of 0, 0.5, 0.9.

## Sheet: Datafile S10
Kingdom	Phylum	Multicellular (%)	Sexual (%)	Eukaryote	Age	Age (ln)	Richness	Richness (ln)	Div. rate (e=0)	Div. rate (e=0.5)	Div. rate (e=0.9)	Taxon name in tree
Amoebozoa		17.5	85.12	1	1773.27	7.48058	803	6.6884	0.00163806	0.0014686	0.00107686	Mastigamoebabalamuthi
Animal		100	100	1	959.599	6.86652	1525728	14.238	0.00644381	0.0061301	0.00540171	Hypsibiusd
Charophyta		38.34	99.48	1	738.547	6.60469	4867	8.4902	0.00499257	0.00458509	0.00363965	Mesostigmaviride
Chlorophyta		40.13	56.15	1	936.304	6.84194	6847	8.8316	0.00409644	0.003775	0.00302902	Dunaliellasalina
Choanozoa		0	0.72	1	1295.71	7.16682	139	4.9345	0.00165393	0.00142401	0.00090318	Monosigabrevicollis
Cryptophyta		0	0	1	1102.82	7.00562	170	5.1358	0.0020225	0.00175184	0.00113604	Guillardiatheta
Excavata		0	9	1	1698.42	7.43746	1655	7.4116	0.00189517	0.00171809	0.00130778	Diplonemapapillatum
Filasterea		0	0	1	942.175	6.84819	3	1.0986	0.00050641	0.00031951	8.404e-05	Capsasporaowczarzaki
Fungi		97.33	66.57	1	1295.71	7.16682	135577	11.8173	0.00396091	0.00372858	0.00318915	basGeastrumpectinatum
Glaucophyta		0	0	1	1550.12	7.34609	18	2.8904	0.00080979	0.00063074	0.00027828	Cyanophoraparadoxa
Haptophytes		0	32.61	1	1546.01	7.34343	109	4.6913	0.00131786	0.00112571	0.00069332	Emilianiahuxleyi
Katablepharidophyta		0	0	1	1102.82	7.00562	10	2.3026	0.00090677	0.00067134	0.00025276	Leucocryptosmarina
Plant		100	86.9	1	433.078	6.07092	345502	12.7528	0.0127885	0.0120934	0.0104795	Zamiaceae200
Rhodophyta		99.56	90.82	1	1486.48	7.30416	7321	8.8985	0.00259981	0.00239734	0.00192744	Porphyrayezoensis
SAR		7.92	89.13	1	1546.01	7.34343	29030	10.2761	0.00288669	0.00269198	0.00223995	Crypthecodiniumcohnii
Archaea	Euryarchaeota	0	0	0	3378.28	8.12512	319	5.7652	0.00074114	0.00065244	0.00044871	Archaeoglobus.fulgidus.DSM4304
Archaea	Crenarchaeota	0	0	0	3378.28	8.12512	58	4.0604	0.00052199	0.00043508	0.00024453	Hyperthermus.butylicus.DSM5456
Eubacteria	Actinobacteria	21.58	0	0	2738.9	7.91531	2419	7.7911	0.0012354	0.00112556	0.00087088	Frankiaceae
Eubacteria	Aquificae	0	0	0	4178.6	8.33773	28	3.3322	0.00034633	0.00027793	0.00013598	Aquificaceae
Eubacteria	Firmicutes	0	0	0	2874	7.96346	1841	7.5181	0.00113607	0.00103141	0.00078886	Listeriaceae
Eubacteria	Bacteroidetes	0	0	0	2099	7.64922	845	6.7393	0.00139441	0.00125123	0.00092018	Bacteroidaceae
Eubacteria	Chlamydiae	0	0	0	2739.05	7.91537	13	2.5649	0.00040669	0.00030854	0.00012502	Chlamydiaceae
Eubacteria	Chlorobi	0	0	0	2098.65	7.64905	17	2.8332	0.0005863	0.00045469	0.00019773	Chlorobiaceae
Eubacteria	Cyanobacteria	53.57	0	0	2761.31	7.92346	632	6.4489	0.00101427	0.0009055	0.00065435	Merismopediaceae
Eubacteria	Chloroflexi	100	0	0	2761.31	7.92346	25	3.2189	0.00050626	0.00040341	0.00019247	Dehalococcoides
Eubacteria	Deinococcus	0	0	0	2738.9	7.91531	74	4.3041	0.00068248	0.00057469	0.00033556	Deinococcaceae
Eubacteria	Fusobacteria	0	0	0	3305.89	8.10346	33	3.4965	0.00045934	0.0003722	0.00018853	Fusobacteriaceae
Eubacteria	Planctomycetes	0	0	0	2762.11	7.92375	17	2.8332	0.00044547	0.00034548	0.00015024	Planctomycetaceae
Eubacteria	Proteobacteria	0.81	0	0	2578.87	7.85511	3586	8.1848	0.00137836	0.00126168	0.00099102	Solibacteraceae
Eubacteria	Spirochaetes	0	0	0	2762.11	7.92375	111	4.7095	0.00074049	0.00063292	0.00039071	Leptospiraceae
Eubacteria	Thermotogae	0	0	0	4188.74	8.34016	40	3.6889	0.00038247	0.00031316	0.00016477	Thermotogaceae
